# Supplementary material for: A cross-platform analysis of 14,177 expression quantitative trait loci derived from lymphoblastoid cell lines
Source: HighWire-hosted journal article supplement (doi:10.1101/gr.142521.112), 2013-01-23
Supplement: Supplemental_Figures.docx [file Supplemental_Figures.docx]

**Supplementary Figure 1. Maximizing the power to detect eQTL by inclusion of Principal Components**

1. Affymetrix expression dataset (MRCA panel)

1. Illumina expression dataset (MRCE)

Top principal components were incrementally added to the model to adjust non-genetic effects. Power was indicated by the number of transcripts with at least one SNP within 1Mb associated with LOD>6.

**Supplementary Figure 2. Strength of new hits by minor allele frequency**

1. Affymetrix expression data (MRCA)

Effect size was estimated in the unit of standard deviation of expression variation. SNP heritability is the percentage of variation in expression that can be explained by the SNP

1. Illumina expression data (MRCE)

Effect size was estimated in the unit of standard deviation of expression variation. SNP heritability is the percentage of variation in expression can be explained by the SNP

**Supplementary Figure 3. Linkage disequilibrium between new hits and HapMap SNPs in the same region**

1. Affymetrix expression data (MRCA)

1. Illumina expression data (MRCE)

Note: MACH R2>0.9 in HapMap imputation are colored in red, R2 in 0.5-0.9 are in green and R2 in 0.3-0.5 are in blue.

**Supplementary Figure 4. Allele frequency distribution of new hits**

1. Affymetrix expression data (MRCA)

1. Illumina expression data (MRCE)

**Supplementary Figure 5. Comparison of association to individual genes between platforms and a cross-platform meta-analysis**

The plots show cross-platform comparisons of –log10(Pvalue) for eQTLs (defined by gene name).

Blue indicates eQTL within 1Mb in *cis* of the eSNP (*Cis_1Mb*); Green indicates *cis* on same chromosome but >1Mb distant (*Cis>1Mb*); and Red indicates *trans* on different chromosomes. Each dot represents a SNP-Gene pair.

The probe or probeset representing the gene may often be different across platforms. Each SNP-Gene combination can have multiple dots due to multiple probes or probesets representing the same gene.

a) Shows the comparison between MRCE (Illumina) and MRCA (Affymetrix) panels

b) Comparison between the Meta-analysis results and the MRCA panel

c) Comparison between Meta-analysis results and the MRCE panel
